# Supplementary material for: Person-to-Person Transmission of Nipah Virus in a Bangladeshi Community
Source: PubMed Central journal article supplement (PMC2878219; doi:10.3201/eid1307.061128), 2007-07
Supplement: 06-1128_appT1-s1.pdf [file 06-1128_appT1-s1.pdf]

Appendix Table 1. Exposures and activities associated with Nipah virus infection, Bangladesh, April–May 2004\*

| Exposure or activity                                           | No. (%) with reported exposure or activity |                       | OR (95% CI)†      | p value   |
|----------------------------------------------------------------|--------------------------------------------|-----------------------|-------------------|-----------|
|                                                                | Case-patients<br>(n = 34)                  | Controls<br>(n = 204) |                   |           |
| <b>Bat exposures</b>                                           |                                            |                       |                   |           |
| Touched                                                        | 0                                          | 4 (2)                 | 1.1 (0.0–10.6)    | 1.00      |
| Ate                                                            | 0                                          | 1 (0.5)               | 6.0 (0.0–234.0)   | 1.00      |
| Observed an increase in no. of fruit bats in or around house   | 0                                          | 4/202 (2)             | 1.14 (0.0–9.089)  | 1.00      |
| <b>Environmental exposures</b>                                 |                                            |                       |                   |           |
| Ate date palm sap                                              | 11/31 (35)                                 | 102 (50)              | 0.51 (0.198–1.26) | 0.163     |
| Harvested date palm sap                                        | 2/33 (6)                                   | 3 (2)                 | 4.0 (0.33–34.9)   | 0.30      |
| Anyone in household harvested date palm sap                    | 5 (15)                                     | 8/203 (4)             | 4.3 (1.0–17.1)    | 0.049‡    |
| Touched or drank directly from a date palm sap collection bowl | 6/33 (18)                                  | 16 (8)                | 2.5 (0.74–7.65)   | 0.15      |
| Ate partially eaten fruit from ground                          | 6 (18)                                     | 32 (16)               | 1.2 (0.35–3.28)   | 0.94      |
| <b>Travel history</b>                                          |                                            |                       |                   |           |
| Visited village of patient F                                   | 26/32 (81)                                 | 156 (76)              | 1.3 (0.49–4.07)   | 0.747     |
| Visited village of index case                                  | 15/33 (45)                                 | 34 (17)               | 4.04 (1.76–9.31)  | 0.0008‡   |
| <b>Exposure to human illness</b>                               |                                            |                       |                   |           |
| Touched person who was unconscious                             | 19/32 (59)                                 | 74/200 (37)           | 2.6 (1.15–6.16)   | 0.019‡    |
| Touched person who later died                                  | 23/31 (74)                                 | 73/197 (37)           | 5.5 (2.14–16.3)   | 0.0001‡   |
| Touched person who had seizures                                | 4/29 (14)                                  | 39/199 (20)           | 0.69 (0.16–2.29)  | 0.75      |
| Touched person who had a fever                                 | 27/33 (82)                                 | 108/202 (53)          | 3.9 (1.51–12.01)  | 0.003‡    |
| Touched person who had respiratory difficulties                | 19/32 (59)                                 | 65/197 (33)           | 3.3 (1.4–8.27)    | 0.0051‡   |
| <b>In the same room (not touching) with person who</b>         |                                            |                       |                   |           |
| Was unconscious                                                | 24/33 (72)                                 | 120/200 (60)          | 1.9 (0.79–4.84)   | 0.183     |
| Later died                                                     | 25/32 (78)                                 | 112/200 (56)          | 3.1 (1.2–9.13)    | 0.0159‡   |
| Had seizures                                                   | 6/29 (21)                                  | 60/198 (30)           | 0.62 (0.19–1.66)  | 0.438     |
| Had a fever                                                    | 29 (85)                                    | 148/203 (73)          | 2.15 (0.77–7.43)  | 0.174     |
| Had respiratory difficulties                                   | 20/33 (61)                                 | 111/200 (56)          | 1.19 (0.54–2.74)  | 0.77      |
| <b>No contact with person who</b>                              |                                            |                       |                   |           |
| Was unconscious                                                | 9/33 (27)                                  | 71/200 (36)           | 0.65 (0.25–1.55)  | 0.404     |
| Later died                                                     | 7/32 (22)                                  | 82/201 (41)           | 0.37 (0.13–0.96)  | 0.039‡    |
| Had seizures                                                   | 24/30 (80)                                 | 130/199 (65)          | 2.1 (0.76–6.52)   | 0.187     |
| Had a fever                                                    | 5 (15)                                     | 54/203 (27)           | 0.48 (0.14–1.33)  | 0.19      |
| Had respiratory difficulties                                   | 13/33 (39)                                 | 88/201 (44)           | 0.87 (0.38–1.95)  | 0.87      |
| <b>Contact with a specific case(s)§¶</b>                       |                                            |                       |                   |           |
| Patient A                                                      | 4 (12)                                     | 17 (8)                | 1.5 (0.34–4.8)    | 0.70      |
| Patient B                                                      | 8 (24)                                     | 8 (4)                 | 6.5 (2.0–21.2)    | 0.001‡    |
| Patient F                                                      | 18 (53)                                    | 32 (16)               | 6.7 (2.9–16.8)    | <0.0001‡# |
| Patient G                                                      | 3 (9)                                      | 7 (3)                 | 2.9 (0.43–15.1)   | 0.31      |
| Patient EE                                                     | 2 (6)                                      | 15 (7)                | 0.79 (0.09–3.5)   | 1.0       |
| Patient II                                                     | 0                                          | 5 (2)                 | 0.89 (0.0–6.5)    | 0.93      |
| <b>Smoking history</b>                                         |                                            |                       |                   |           |
| Currently smoke                                                | 13 (38)                                    | 61 (30)               | 1.9 (0.61–6.4)    | 0.32      |
| Share cigarettes, biri, hukka, or pipe                         | 10/33 (30)                                 | 45 (22)               | 1.9 (0.61–5.9)    | 0.31      |

\*Values are no. subjects responding affirmatively/total no. responding (%) unless otherwise indicated. OR, odds ratio; CI, confidence interval.

†Exact method using univariate conditional logistic regression.

‡Included in multivariate conditional logistic regression analysis.

§Contact was defined as seeing, talking, eating or drinking, touching, and providing care.

¶Contact with ≥1 of the 34 probable or confirmed case-patients (selected few shown in table).

#Remained in final multivariate model.
