# Supplementary material for: Person-to-Person Transmission of Nipah Virus in a Bangladeshi Community
Source: PubMed Central journal article supplement (PMC2878219; doi:10.3201/eid1307.061128), 2007-07
Supplement: 06-1128_appT2-s2.pdf [file 06-1128_appT2-s2.pdf]

Appendix Table 2. Exposures to patient F and association with Nipah virus infection, Bangladesh, April–May 2004\*

| Exposure                                              | No. (%) with reported exposure or activity |                      | OR (95% CI)†        | p value |
|-------------------------------------------------------|--------------------------------------------|----------------------|---------------------|---------|
|                                                       | Case-patients<br>(n = 18)                  | Controls<br>(n = 32) |                     |         |
| Contact with patient F                                |                                            |                      |                     |         |
| During illness                                        | 16 (89)                                    | 31 (97)              | 0.27 (0.004–5.46)   | 0.583   |
| Day of death                                          | 13 (72)                                    | 15 (47)              | 2.9 (0.74–12.90)    | 0.149   |
| After death                                           | 17 (94)                                    | 22 (69)              | 7.5 (0.903–354.68)  | 0.069   |
| Patient F activity                                    |                                            |                      |                     |         |
| Coughed while nearby                                  | 15/17 (88)                                 | 17/25 (68)           | 3.4 (0.559–38.15)   | 0.252   |
| Unconscious while nearby                              | 15 (83)                                    | 30/31 (97)           | 0.17 (0.003–2.365)  | 0.268   |
| Vomited while nearby                                  | 8 (44)                                     | 9/30 (30)            | 1.8 (0.465–7.39)    | 0.481   |
| Proximity to patient F                                |                                            |                      |                     |         |
| Always >6 m                                           | 0 (0)                                      | 2 (6)                | 0.72 (0.0–9.518)    | 0.809   |
| Always >1.5 m but <6 m                                | 2 (11)                                     | 20 (63)              | 0.08 (0.008–0.427)  | 0.008   |
| Always >0.5 m but <1.5 m                              | 4 (22)                                     | 3 (9)                | 2.7 (0.398–21.04)   | 0.4015  |
| Sometimes <30 cm (1 foot)                             | 1 (6)                                      | 5 (16)               | 0.324 (0.006–3.267) | 0.570   |
| Sometimes <15 cm (0.5 feet)                           | 7 (39)                                     | 3 (9)                | 5.9 (1.106–47.79)   | 0.035   |
| Sometimes touching                                    | 6 (33)                                     | 1 (3)                | 14.6 (1.53–735.12)  | 0.013   |
| Length of time spent with patient F                   |                                            |                      |                     |         |
| <10 min                                               | 2 (11)                                     | 10 (31)              | 0.28 (0.026–1.59)   | 0.205   |
| 10–15 min                                             | 2 (11)                                     | 9 (28)               | 0.33 (0.03–1.89)    | 0.298   |
| 30 min                                                | 0                                          | 9 (28)               | 0.11 (0.0–0.766)    | 0.022   |
| 1–1.5 h                                               | 0                                          | 7 (22)               | 0.154 (0.0–1.122)   | 0.067   |
| 3–4 h                                                 | 2 (11)                                     | 1 (3)                | 3.76 (0.183–235.8)  | 0.583   |
| >4 h                                                  | 16 (89)                                    | 6 (19)               | 31.2 (5.35–351.68)  | <0.0001 |
| Specific interactions with patient F                  |                                            |                      |                     |         |
| Received sneeze/cough in face from patient            | 4/13 (31)                                  | 2 (6)                | 6.3 (0.766–80.81)   | 0.097   |
| Ate with patient                                      | 4 (22)                                     | 2 (6)                | 4.2 (0.524–51.05)   | 0.228   |
| Shared same plate/bowl/cup/glass                      | 6 (33)                                     | 1 (3)                | 8.5 (0.749–449.8)   | 0.101   |
| Fed patient with a spoon or cup                       | 10 (56)                                    | 1 (3)                | 35.3 (4.064–999.9)  | <0.0001 |
| Fed patient with hands                                | 7 (39)                                     | 1 (3)                | 18.5 (2.02–916.63)  | 0.004   |
| Talked with patient                                   | 11 (61)                                    | 4 (13)               | 10.3 (2.25–59.31)   | 0.0011  |
| Held patient's hands                                  | 13 (72)                                    | 6 (19)               | 10.6 (2.443–55.26)  | <0.0006 |
| Touched patient's face                                | 12/17 (71)                                 | 4 (13)               | 15.5 (3.18–96.86)   | 0.0001  |
| Shared a bed with patient                             | 2 (11)                                     | 0                    | 4.5 (0.341+ Inf)    | 0.25    |
| Helped patient walk, sit, or stand                    | 8 (44)                                     | 4 (13)               | 5.4 (1.15–30.18)    | 0.03    |
| Lifted or carried patient                             | 2 (11)                                     | 2 (6)                | 1.9 (0.12–27.8)     | 0.91    |
| Cleaned patient's hands with a cloth or clothing      | 5 (28)                                     | 0                    | 14.9 (1.89 + Inf)   | 0.0081  |
| Cleaned patient's face with a cloth or clothing       | 4 (22)                                     | 0                    | 11.0 (1.29 + Inf)   | 0.027   |
| Wiped patient's face with hands                       | 3 (17)                                     | 0                    | 7.6 (0.775 + Inf)   | 0.083   |
| Wiped patient's nose/mouth with hands                 | 3 (17)                                     | 0                    | 7.6 (0.775 + Inf)   | 0.083   |
| Helped patient change clothes                         | 1 (6)                                      | 0                    | 1.78 (0.046 + Inf)  | 0.72    |
| Helped patient use the toilet                         | 2 (11)                                     | 0                    | 4.5 (0.41+ Inf)     | 0.249   |
| Cleaned feces from patient's body                     | 0                                          | 0                    | Undefined           | NA      |
| Changed patient's bed linens                          | 0                                          | 0                    | Undefined           | NA      |
| Washed patient's clothes                              | 1 (6)                                      | 0                    | 1.78 (0.046 + Inf)  | 0.72    |
| Washed patient's bed linens                           | 0                                          | 1 (3)                | 1.78 (0.0–69.3)     | 1.00    |
| Dried out patient's mouth after death                 | 0                                          | 1 (3)                | 2.3 (0.0–89.14)     | 1.00    |
| Always/sometimes kept face covered while near patient | 0                                          | 0                    | Undefined           | NA      |
| Activity after contact with patient F                 |                                            |                      |                     |         |
| Washed hands                                          | 2/17 (12)                                  | 15/32 (47)           | 0.196 (0.03–0.895)  | 0.032   |

\*Values are no. of subjects responding affirmatively/total no. responding (%) unless otherwise indicated. OR, odds ratio; CI, confidence interval; NA, not available.

†Exact method using univariate conditional logistic regression. + Inf, positive infinity, an unknown upper limit for the CI.
